# Supplementary material for: Anti-Inflammatory Effects and Decreased Formation of Neutrophil Extracellular Traps by Enoxaparin in COVID-19 Patients
Source: MDPI journal article supplement (doi:10.3390/ijms23094805), 2022-04-27
Supplement: s1 [file s1]

## Anti-inflammatory Effects and Decreased Formation of Neutrophil Extracellular Traps by Enoxaparin in COVID-19 Patients

Supplemental Table S1:

Plasma levels of NET products and IL-8 in COVID-19 patients and NET formation induced by COVID-19 plasma.

| Figure | Parameter             | Healthy control         | Mild case                | Moderate case             | Severe case               | <i>p</i> -value vs Healthy control |
|--------|-----------------------|-------------------------|--------------------------|---------------------------|---------------------------|------------------------------------|
| 1A     | dsDNA                 | 17.84<br>(15-21)        | 23.38<br>(19-26)         | 22.73<br>(14-31)          | 36.32<br>(27-39)          | < 0.05 at Severe                   |
| 1B     | NE                    | 88.49<br>(59-117)       | 105.91<br>(57-158)       | 150.50<br>(140-163)       | 169.08<br>(161-175)       | < 0.05 at Severe and Moderate      |
| 1C     | Histone-DNA complexes | 0.039<br>(0.037-0.043)  | 0.033<br>(0.027-0.044)   | 0.398<br>(0.262-0.612)    | 1.145<br>(1.049-1.264)    | < 0.05 at Severe and Moderate      |
| 1D     | MPO-DNA complexes     | 0.023<br>(0.020-0.027)  | 0.059<br>(0.023-0.148)   | 0.128<br>(0.222-0.119)    | 0.243<br>(0.183-0.285)    | < 0.05 at Severe                   |
| 1E     | IL-8                  | 6.50<br>(5.20-7.31)     | 8.41<br>(5.65-14.78)     | 11.14<br>(6.74-18.26)     | 18.12<br>(10.00-25.22)    | < 0.05 at Severe                   |
| 1G     | %NETs counting        | 38.58<br>(32-48)        | 62.25<br>(50-74)         | 73.25<br>(61-86)          | 80.75<br>(74-88)          | < 0.05 at Severe and Moderate      |
| 1H     | dsDNA                 | 90.54<br>(74.06-105.01) | 110.66<br>(98.63-135.93) | 120.82<br>(106.46-130.05) | 121.84<br>(114.64-127.14) | < 0.05 at Severe and Moderate      |

Supplemental Table S2:

The effect of enoxaparin pretreatment on NETs induced by COVID-19 plasma in vitro.

| Figure | Parameter                   | Plasma alone              | ENOX 0.5 IU/ml            | ENOX 1.0 IU/ml            | ENOX 2.0 IU/ml                 | <i>p</i> -value vs Plasma alone                                   |
|--------|-----------------------------|---------------------------|---------------------------|---------------------------|--------------------------------|-------------------------------------------------------------------|
| 2B     | %NETs counting              | 54.1<br>(48.3-61.0)       | 33.9<br>(32.1-36.2)       | 26.7<br>(21.8-32.7)       | 27.5<br>(25.4-30.6)            | <0.05 at ENOX 1.0 and 2.0 IU/ml                                   |
| 2C     | dsDNA                       | 124.37<br>(100.41-150.00) | 123.44<br>(97.13-155.92)  | 109.14<br>(86.60-139.81)  | 105.06<br>(85.13-126.74)       | <0.05 at ENOX 1.0 and 2.0 IU/ml                                   |
| 2D     | NE                          | 120.86<br>(117.94-126.95) | 121.06<br>(117.83-125.54) | 119.95<br>(116.87-124.02) | 117.56<br>(112.21-120.82)      | <0.05 at ENOX 2.0 IU/ml                                           |
| 2E     | Histone-DNA complexes       | 0.21<br>(0.11-0.32)       | 0.11<br>(0.04-0.30)       | 0.14<br>(0.07-0.19)       | 0.06<br>(0.05-0.03)            | <0.05 at ENOX 2.0 IU/ml                                           |
| Figure | Parameter                   | Untreated                 | Healthy plasma            | COVID-19 plasma           | COVID-19 plasma+ENOX 2.0 IU/ml | <i>p</i> -value COVID-19 plasma vs COVID-19 plasma+ENOX 2.0 IU/ml |
| 2F     | <i>PAD4</i> gene expression | 1.00                      | 1.03<br>(0.60-1.51)       | 1.65<br>(1.57-1.79)       | 1.20<br>(0.95-1.23)            | <i>Ns</i>                                                         |
| 2G     | <i>RELA</i> gene expression | 1.00                      | 1.33                      | 2.73                      | 1.44                           | <0.05                                                             |

|    |                     |      |             |             |             |       |
|----|---------------------|------|-------------|-------------|-------------|-------|
|    |                     |      | (1.11-1.78) | (1.55-3.62) | (1.23-1.54) |       |
| 2H | SYK gene expression | 1.00 | 1.64        | 2.10        | 1.02        | <0.05 |
|    |                     |      | (1.03-2.76) | (1.39-2.50) | (0.65-1.53) |       |
| 2I | PKC gene expression | 1.00 | 1.54        | 1.65        | 1.03        | <0.05 |
|    |                     |      | (1.88-1.94) | (1.21-1.95) | (0.82-1.23) |       |
| 2J | ERK gene expression | 1.00 | 1.60        | 2.31        | 0.97        | <0.05 |
|    |                     |      | (1.10-2.23) | (1.62-2.71) | (0.81-1.10) |       |

**Supplemental Table S3:**

**The effect of enoxaparin prophylaxis in COVID-19 patients on NETs and expression of inflammatory markers in COVID-19 patients.**

| Figure | Parameter            | Before Enoxaparin | After Enoxaparin | p-value |
|--------|----------------------|-------------------|------------------|---------|
| 3A     | TNF- $\alpha$        | 96.17             | 43.97            | Ns      |
|        |                      | (22.68-183.796)   | (21.20-61.52)    |         |
| 3B     | IL-8                 | 21.36             | 12.93            | <0.05   |
|        |                      | (17.17-23.04)     | (6.30-17.39)     |         |
| 3C     | IL-6                 | 29.20             | 3.00             | <0.05   |
|        |                      | (19.5-42.5)       | (1.99-4.98)      |         |
| 3D     | Procalcitonin        | 0.69              | 0.15             | <0.05   |
|        |                      | (0.31-1.32)       | (0.04-0.42)      |         |
| 3E     | hs-CRP               | 97.32             | 47.24            | Ns      |
|        |                      | (8.56-154.85)     | (4.43-96.84)     |         |
| 3F     | Neutrophil (%)       | 85.13             | 85.08            | Ns      |
|        |                      | (79.6-90.3)       | (83.3-85.7)      |         |
| 3H     | %NET                 | 10.5              | 9.5              | Ns      |
|        |                      | (7.0-14.0)        | (5.0-13.0)       |         |
| 3I     | dsDNA                | 698.53            | 659.63           | Ns      |
|        |                      | (553.46-1001.35)  | (536.44-735.72)  |         |
| 3J     | NE                   | 156.76            | 163.97           | Ns      |
|        |                      | (137.30-170.96)   | (156.67-172.17)  |         |
| 3K     | MPO-DNA complexes    | 0.19              | 0.17             | Ns      |
|        |                      | (0.05-0.29)       | (0.07-0.19)      |         |
| 3L     | PAD4 gene expression | 1.00              | 0.52             | Ns      |
|        |                      |                   | (0.19-0.87)      |         |
| 3M     | RELA gene expression | 1.00              | 0.604            | <0.05   |
|        |                      |                   | (0.39-0.80)      |         |
| 3N     | SYK gene expression  | 1.00              | 0.58             | <0.05   |
|        |                      |                   | (0.50-0.67)      |         |
| 3O     | PKC gene expression  | 1.00              | 0.70             | Ns      |
|        |                      |                   | (0.38-1.02)      |         |

|             |                     |      |      |       |
|-------------|---------------------|------|------|-------|
| 3P          | ERK gene expression | 1.00 | 0.70 | <0.05 |
| (0.50-0.87) |                     |      |      |       |

**Supplemental Table S4:**

**Living guidance for clinical management of COVID-19<sup>1</sup> by the World Health Organization (WHO)**

| Group    | Definition               | Details                                                                                                                                                                                                                                                                                                                                                                                |
|----------|--------------------------|----------------------------------------------------------------------------------------------------------------------------------------------------------------------------------------------------------------------------------------------------------------------------------------------------------------------------------------------------------------------------------------|
| Mild     | No pneumonia             | <ul style="list-style-type: none"> <li>- asymptomatic group or symptomatic without evidence of viral pneumonia or hypoxia</li> <li>- most experience of mild symptoms are fever, cough, fatigue, anorexia, shortness of breath, myalgias. Other non-specific symptoms, such as sore throat, nasal congestion, headache, diarrhea, nausea, and vomiting</li> </ul>                      |
| Moderate | Moderate Pneumonia       | - clinical signs of pneumonia (fever, cough, dyspnea, fast breathing) but not severe including with SpO <sub>2</sub> ≥ 90% on room air                                                                                                                                                                                                                                                 |
| Severe   | Severe pneumonia or ARDS | <ul style="list-style-type: none"> <li>- clinical signs of severe pneumonia (cough or difficulty in breathing + fast breathing or chest wall indrawing) including SpO<sub>2</sub> &lt; 90% on room air</li> <li>- chest imaging: (radiograph, CT scan, or lung ultrasound): bilateral opacities, not fully explained by volume overload, lobar or lung collapse, or nodules</li> </ul> |
